# Supplementary material for: The lacustrine-water vapor isotope inventory experiment L-WAIVE
Source: Copernicus journal article supplement (doi:10.5194/acp-2020-1194), 2020-12-01
Supplement: Supplementary file [file acp-2020-1194-AC3-supplement.pdf]

## Editor comments

As you have seen, both reviewers have submitted their comments to your interesting isotope field experiment paper. Both reviewers emphasise the great value of this diverse dataset, however they also struggled a bit with understanding the objective of this first publication on the L-WAIVE field experiment. Reviewer 1 mentions the option to publish this study as a dataset paper. You decided against this and submitted your manuscript as a normal ACP paper. I think this is fine, but it requires you to provide more interpretation of the datasets in the revised version of your paper. Also reviewer 2 was expecting you to discuss the questions you pose at the beginning of your paper in the light of the new observations. My recommendation therefore is that you perform major revisions of your manuscript, considering all the reviewers' comments and with a special focus on better framing the paper as (i) a campaign overview paper but (ii) also a paper that provides new insight into the many questions posed in the introduction, based on the interpretation of the new measurements.

**We have improved the article to make its purpose clearer and to add elements to better support what we have written about the influence of the lake on the lower tropospheric water vapor isotopic composition. We feel it is worth framing the 'overview' aspect of the paper because many components of the L-WAIVE experiment are quite original (use of multiple ULAs, ULA-borne CRDS measurements, isotopologues sampling in the vapor and liquid phase in the environment of the Annecy lake, ...). Providing a comprehensive overview of the experiment is therefore important and requires that a significant part of the paper be dedicated to the underlying experimental strategy and the description of involved instrumental assets. This may have left the reviewers with the impression that the paper is merely a campaign report. We would like to insist that this is not the case and that the paper already contains a significant number of new insights, such as the consolidated vision of water isotopologues across the air/water compartments in a lake area. To further emphasize the 'new insights' aspect of the paper, a clearer link is made with the local, lower valley dynamics documented with the wind lidar measurements.**

**In the following, we provide a version of the article where all changes made to comply with the reviewer's comments are highlighted. Text in blue indicates added material, while text in green indicates text present in the original version of the MS that has been moved elsewhere in the revised version of the MS.**
